# Supplementary material for: Small-scale distribution of microbes and biogeochemistry in the Great Barrier Reef
Source: PeerJ journal article supplement (doi:10.7717/peerj.10049), 2020-10-21

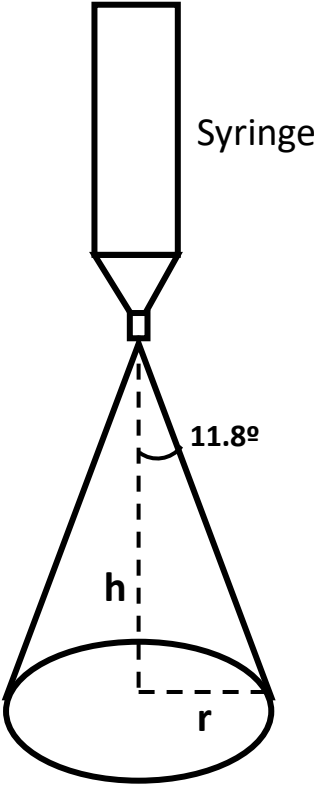

Supplement: Figure_S1.pdf [file Figure_S1.pdf]
